# Supplementary material for: Realizing ultrahigh recoverable energy density and superior charge–discharge performance in NaNbO3-based lead-free ceramics via a local random field strategy
Source: Royal Society of Chemistry journal article supplement (doi:10.1039/c9tc06711f), 2020-01-01
Supplement: c9tc06711f1.pdf [file c9tc06711f1.pdf]

**Realizing ultrahigh recoverable energy density and superior  
charge-discharge performance in NaNbO<sub>3</sub>-based lead-free  
ceramics via a local random field strategy**

Junpeng Shi, Xiuli Chen\*, Xu Li, Jie Sun, Congcong Sun, Feihong Pang, Huanfu  
Zhou

*Collaborative Innovation Center for Exploration of Hidden Nonferrous Metal Deposits and  
Development of New Materials in Guangxi, Key Laboratory of Nonferrous Materials and New  
Processing Technology, Ministry of Education, School of Materials Science and Engineering,  
Guilin University of Technology, Guilin 541004, China.*

**\* Corresponding authors:**

*E-mail addresses:* cxlnwpu@163.com.

## 1. Experimental procedures

### 1.1 Fabrication of $(1-x)\text{NaNbO}_3-x\text{Bi}(\text{Mg}_{2/3}\text{Ta}_{1/3})\text{O}_3$ ceramics

$(1-x)\text{NaNbO}_3-x\text{Bi}(\text{Mg}_{2/3}\text{Ta}_{1/3})\text{O}_3$  (xBMT) ceramics were fabricated via the conventional solid-state reaction method. The raw materials are  $\text{Na}_2\text{CO}_3$ ,  $\text{Nb}_2\text{O}_5$ ,  $\text{Bi}_2\text{O}_3$ ,  $\text{MgO}$ , and  $\text{Ta}_2\text{O}_5$  ( $\geq 99\%$ ). Stoichiometric proportions of the raw materials were mixed in alcohol by using zirconia balls for 6h. After drying, the mixed powders were calcined at  $900\text{ }^\circ\text{C}$  for 5h. The calcined powder was milled for 6h in the same way as the original powders. The resultant powders were mixed with 6wt% of polyvinyl alcohol (PVA) and pressed into pellets with 8mm in diameter and 1mm in thickness by uniaxial pressing at 200 MPa. The samples were coated with calcined powders of the same composition in order to minimize volatilization of alkaline elements and sintered at different temperatures, depending on the doping content, ranging from 1200 to  $1330\text{ }^\circ\text{C}$  for 2h in the air.

### 1.2 Characterization

The phase structures of the samples were analysed using an X-ray powder diffraction (XRD, Model X'Pert PRO; PANalytical, Almelo, Netherlands) with  $\text{Cu K}_\alpha$  radiation ( $\lambda = 0.15406\text{ nm}$ ). The microstructures of the samples were observed via a scanning electron microscopy (Model JSM6380-LV SEM, JEOL, Tokyo, Japan). The relative permittivity and loss tangent of the ceramics were measured using a precision impedance analyser (Model 4294A, Hewlett-Packard Co, Palo Alto, CA) in the

temperature range of -200°C to 300°C with the heating rate of 2°C/min. Polarization hysteresis loops were measured via a ferroelectric material parameters tester (RT66, Radiant Technologies, NM, USA). To better characterize the energy storage properties, the sintered samples were polished down to a thickness of  $0.15 \pm 0.01$  mm and were coated via Ag electrode with a diameter of 2 mm. The dielectric breakdown strength (*BDS*) was measured at room temperature by using a voltage-withstand test device (RK2671AM). The energy release properties of ceramic capacitors were investigated via a charge-discharge platform with a specially-designed and high-speed capacitor discharge resistance, inductance, and capacitance load circuit (RLC).

## 2. Results and discussion

To provide further insights into the crystal structure and disorder characteristics of the *x*BMT ceramics, Raman spectroscopy was performed, and the results are shown in Fig. S1. Four main regions ( $\nu_1$  is associated with the vibration of A-site cations,  $\nu_2$  is related to the  $\text{Nb}^{5+}$  cation displacement and Nb-O vibrations ( $A_1$ ), the  $\nu_3$  and  $\nu_4$  peaks mainly originate mainly from the  $\text{NbO}_6$  octahedron stretching vibration, and the high-frequency region above  $\nu_5$  is related to the  $A_1+E$  vibrations) are presented in Fig. S1, which are consistent with the previously reported perovskite structure [1-4]. The  $\nu_1$  and  $\nu_2$  peaks shift towards a lower wavenumber with an increase the BMT content, which indicates that the incorporation of BMT decreases the  $\text{Nb}^{5+}$  cation displacement and softens the bending vibration of Nb-O vibration. The  $\nu_2$  peak gradually fades away with the increase in the BMT content, which may result from the higher symmetry. All the peaks become weaker in intensity and broader in shape with the increment of the BMT

content. This phenomenon may be related to the random distribution of  $\text{Bi}^{3+}$  and  $\text{Na}^+$  in A-sites due to their large differences in the radius and valence, as generally observed in doped  $\text{K}_{0.5}\text{Na}_{0.5}\text{NbO}_3$  systems [5]. Moreover, the bands of the Nb-O vibrations and  $\text{NbO}_6$  octahedra become broader with increasing  $x$ , which is a result of the B-site disorder in the  $x\text{BMT}$  ceramics by the  $(\text{Mg}_{2/3}\text{Ta}_{1/3})^{3+}$  substitute for  $\text{Nb}^{5+}$  [6]. A typical dielectric relaxor behaviour is observed in the 0.22BMT ceramics, and a certain degree of cation disorder is indicated by the Raman studies [7]. These results further prove that the disorder of both A-site and B-site and structure complexity was enhanced, which had an important influence on the dielectric properties.

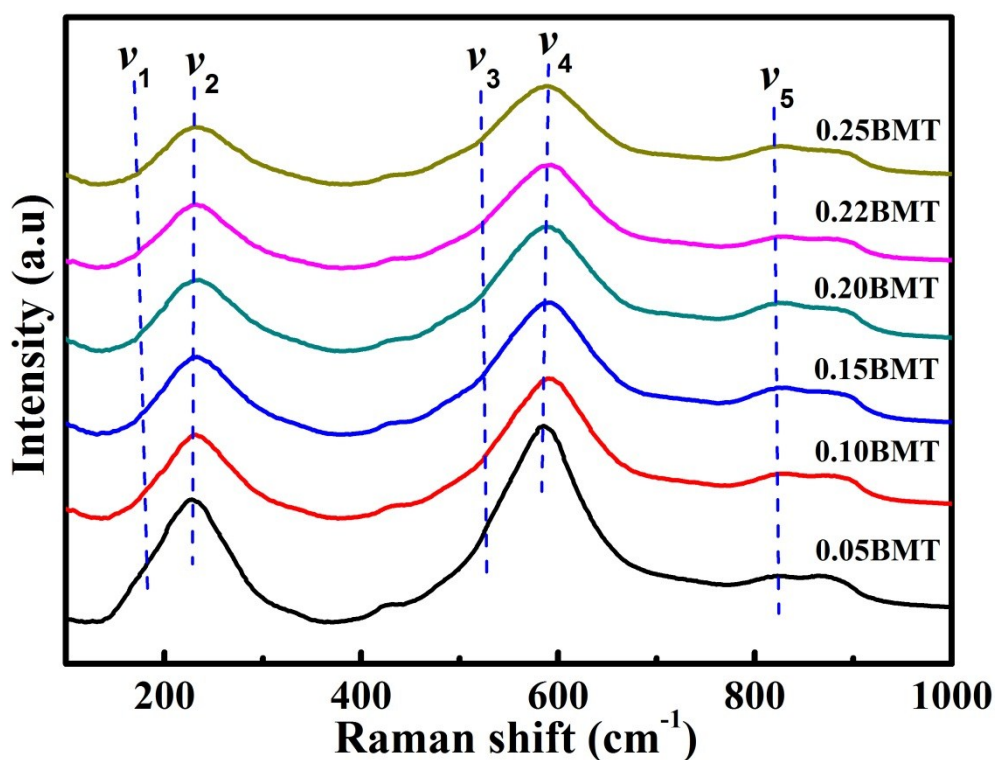

**Fig. S1** Raman spectra of  $x\text{BMT}$  ceramics at room temperature.

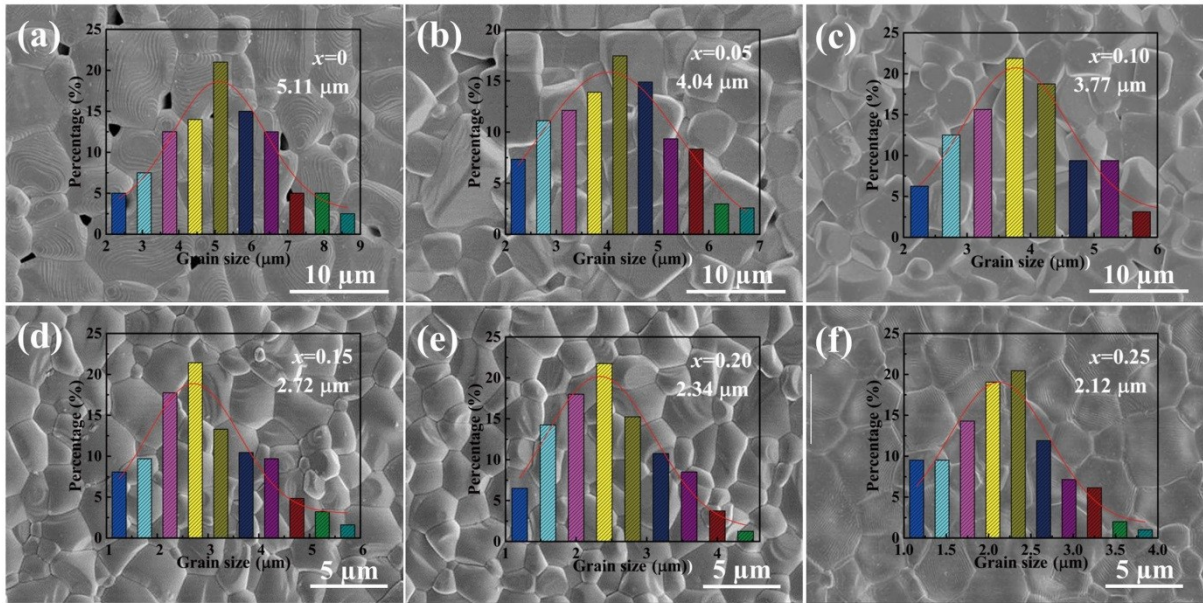

**Fig. S2** SEM images of  $x$ BMT ceramics at optimum sintering temperature: (a)  $x=0$ , (b)  $x=0.05$ , (c)  $x=0.10$ , (d)  $x=0.15$ , (e)  $x=0.20$  and (f)  $x=0.25$ . Insert show grain size distribution and average grain size of  $x$ BMT ceramics.

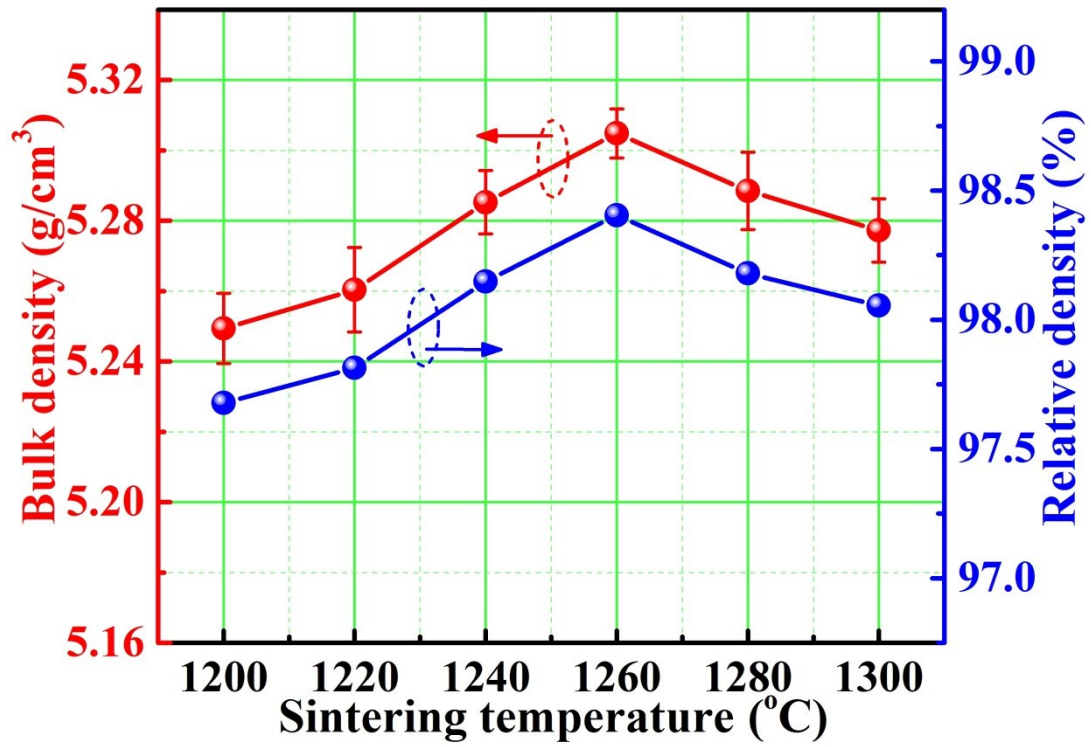

**Fig. S3** Bulk and relative density of the 0.22BMT ceramics as functions of the sintering temperature.

The 0.22BMT ceramics demonstrate a thermally activated relaxation of dielectric loss at high temperature ( $>150\text{ }^{\circ}\text{C}$ ), characterized by the increase in  $\tan \delta$  with temperature (see Fig. 5a). The thermally activated relaxation is believed to be related to the movement of the dipoles formed by the associations of the defects involving oxygen vacancies formed under the reducing atmosphere during the sintering process. The presence of oxygen vacancies in the 0.22BMT ceramic was confirmed by XPS analysis (Fig. S4b). However, the presence of surface hydroxyl ( $-\text{OH}$ ) and adsorbed surface  $\text{H}_2\text{O}$  can be excluded due to the specimens being subjected to surface cleaning by Ar ion sputtering for 10 seconds before the XPS test [8]. Therefore, we can conclude that peak II mainly originates from the oxygen vacancies.

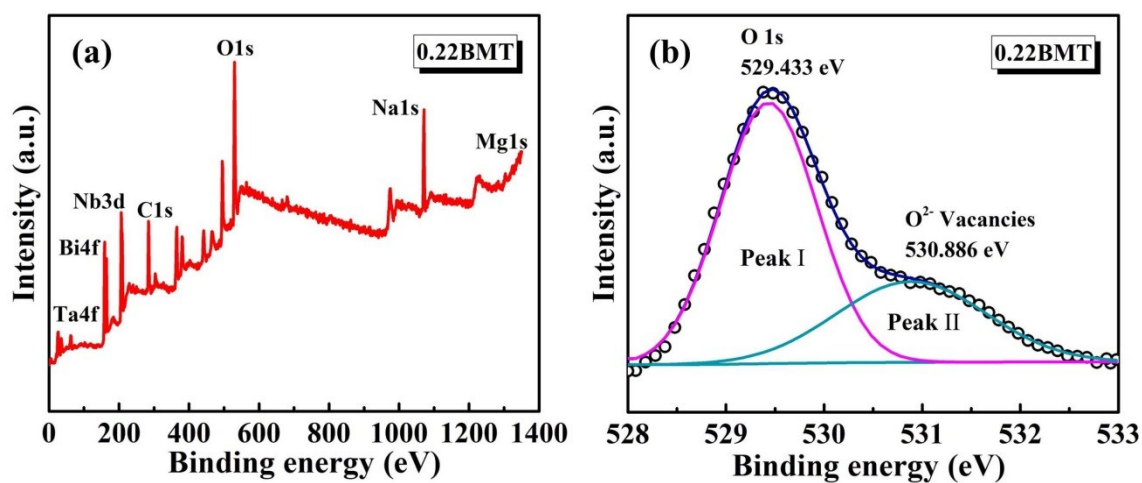

**Fig. S4** Survey spectrum (a) and high resolution XPS of O 1s (b) for 0.22BMT ceramics sintered at their optimized temperatures.

**Table S1.** Comparison of the charge-discharge properties of the BMT ceramics and other reported ceramics.

| Composition                                                                                                           | $E$ (kV/mm) | $t_{0.9}$ (ns) | $C_D$ (A/cm <sup>2</sup> ) | $P_D$ (MW/cm <sup>3</sup> ) | Ref.      |
|-----------------------------------------------------------------------------------------------------------------------|-------------|----------------|----------------------------|-----------------------------|-----------|
| $\text{Pb}_{0.90}\text{La}_{0.04}\text{Ba}_{0.04}(\text{Zr}_{0.616}\text{Sn}_{0.264}\text{Ti}_{0.12})\text{O}_3$      | 6.67        | ~1000          | ~242                       | ~1.95                       | [9]       |
| $\text{Pb}_{0.925}\text{La}_{0.05}(\text{Zr}_{0.42}\text{Sn}_{0.40}\text{Ti}_{0.18})\text{O}_3$                       | 3.5         | ~65            | ~183                       | ~3.2                        | [10]      |
| $\text{Pb}_{0.93}\text{La}_{0.04}\text{Nb}_{0.02}(\text{Zr}_{0.42}\text{Sn}_{0.40}\text{Ti}_{0.18})_{0.98}\text{O}_3$ | 4.0         | ~500           | ~143                       | ~2.9                        | [11]      |
| $\text{Pb}_{0.87}\text{Ba}_{0.1}\text{La}_{0.2}(\text{Zr}_{0.6}\text{Ti}_{0.07}\text{Sn}_{0.33})\text{O}_3$           | 6.0         | /              | ~223                       | ~6.69                       | [12]      |
| BNT-BT-0.32SBT                                                                                                        | 6.0         | ~675           | ~400                       | ~12.0                       | [12]      |
| $\text{Na}_{0.7}\text{Bi}_{0.1}\text{NbO}_3$                                                                          | 10.0        | ~155           | ~1250                      | ~62.5                       | [13]      |
| $0.91\text{NaNbO}_3\text{-}0.09\text{Bi}(\text{Zn}_{0.5}\text{Ti}_{0.5})\text{O}_3$                                   | 11.0        | ~250           | ~275                       | ~20                         | [14]      |
| $0.78\text{NaNbO}_3\text{-}0.22\text{Bi}(\text{Mg}_{2/3}\text{Ta}_{1/3})\text{O}_3$                                   | 14.0        | ~23            | ~538                       | ~38                         | This work |



## References

- [1] Y. P. Pu, M. T. Yao, H. R. Liu and T. Fromling, *J. Eur. Ceram. Soc.*, 2016, **36**, 2461-2468.
- [2] S. N. Tripathy, K. K. Mishra, S. Sen and D. K. Pradhan, *J. Am. Ceram. Soc.*, 2014, **97**, 1846-1854.
- [3] Q. Li, J. Wang, Y. Ma, L. T. Ma, G. Z. Dong and H. Q. Fan, *J. Alloys. Compd.*, 2016, **663**, 701-707.
- [4] B. Parija, S. K. Rout, L. S. Cavalcante, A. Z. Simoes, S. Panigrahi, E. Longo and N. C. Batista, *Appl. Phys. A.*, 2012, **109**, 715-723.
- [5] Q. Liu, Y. C. Zhang, L. Zhao, J. Gao, Z. Zhou, K. Wang, X. W. Zhang, L. T. Li and J. F. Li, *J. Mater. Chem. C*, 2018, **6**, 10618-10627.
- [6] L. Zhang, Y. Pu and M. Chen, *J. Alloys Compd.*, 2019, **775**, 342-347.
- [7] B. Zalar, V. V. Laguta and R. Blinc, *Phys. Rev. Lett.*, 2003, **90**, 037601.
- [8] Z. Hou, O. Yokota, T. Tanaka and T. Yashima, *Appl. Catal. A.*, 2003, **253**, 381-387.
- [9] R. Xu, Z. Xu, Y. Feng, H. He, J. Tian and D. Huang, *J. Am. Ceram. Soc.*, 2016, **99**, 2984.
- [10] H. Zhang, X. Chen, F. Cao, G. Wang, X. Dong, Z. Hu and T. Du, *J. Am. Ceram. Soc.*, 2010, **93**, 4015.
- [11] X. Chen, H. Zhang, F. Cao, G. Wang, X. Dong, Y. Gu, H. He and Y. Liu, *J. Appl. Phys.*, 2009, **106**, 034105.
- [12] F. Li, K. Yang, X. Liu, J. Zou, J. Zhai, B. Shen, P. Li, J. Shen, B. Liu and P. Chen, *Scripta Mater.*, 2017, **141**, 15.

[13] M. Zhou, R. Liang, Z. Zhou and X. Dong, *J. Mater. Chem. A*, 2018, **6**, 17896.

[14] Y. Fan, Z. Zhou, R. Liang and X. Dong, *J. Eur. Ceram. Soc.*, 2019, **39**, 4770-4777.
